# Supplementary material
Source: publisher figshare collection journal article supplement (https://sage.figshare.com/ndownloader/files/23757715)
Supplement: Supplementary file 1 [file 23757715]

## Supporting Information

# Synthesis and characterization of a triphenylamine-dibenzosuberenone-based conjugated organic material and an investigation of its photovoltaic properties

Musa Erdoğan<sup>a,\*</sup> and Sabit Horoz<sup>b</sup>

<sup>a</sup> *Kafkas University, Faculty of Engineering and Architecture, Department of Food Engineering, Kars, Turkey, 36100*

<sup>b</sup> *Siirt University, Faculty of Engineering, Department of Electrical and Electronics Engineering, Siirt, Turkey, 56100*

\*E-mail address: musa.erdogan.kafkas@gmail.com

Supporting Spectral data of the compound **3**

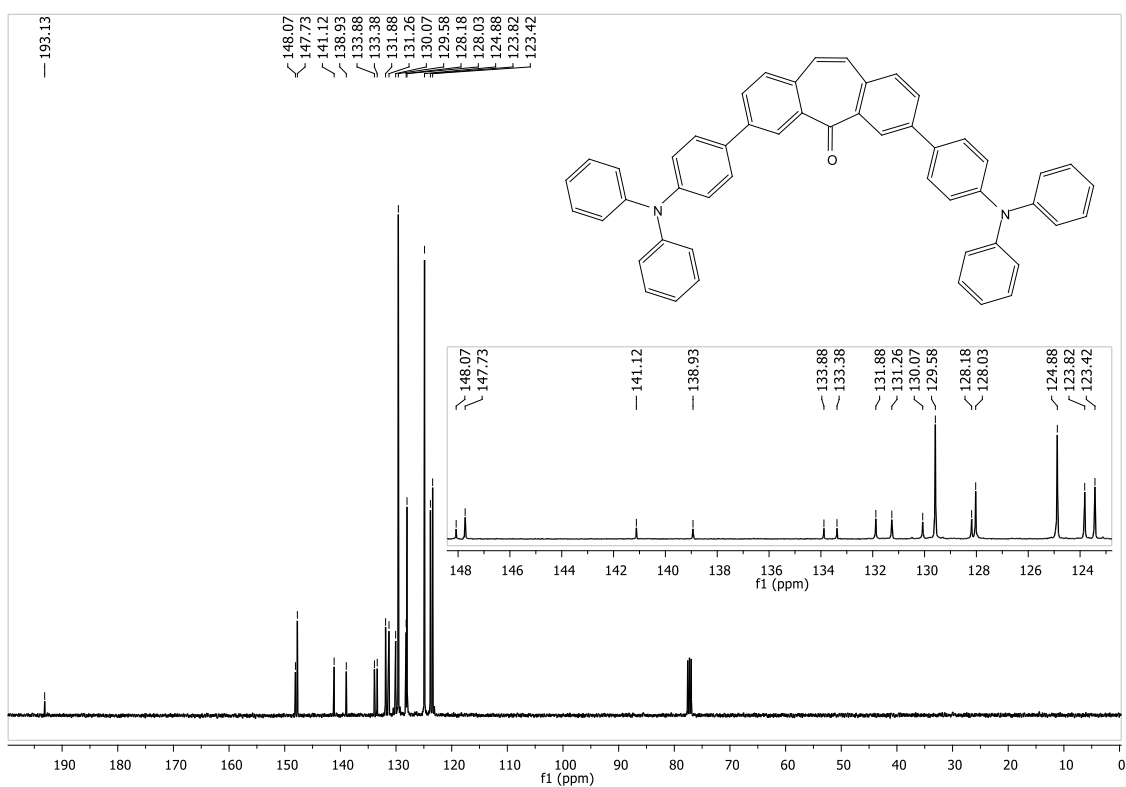

**Figure 1.** <sup>1</sup>H-NMR (400 MHz, CDCl<sub>3</sub>) spectrum of the compound **3**.

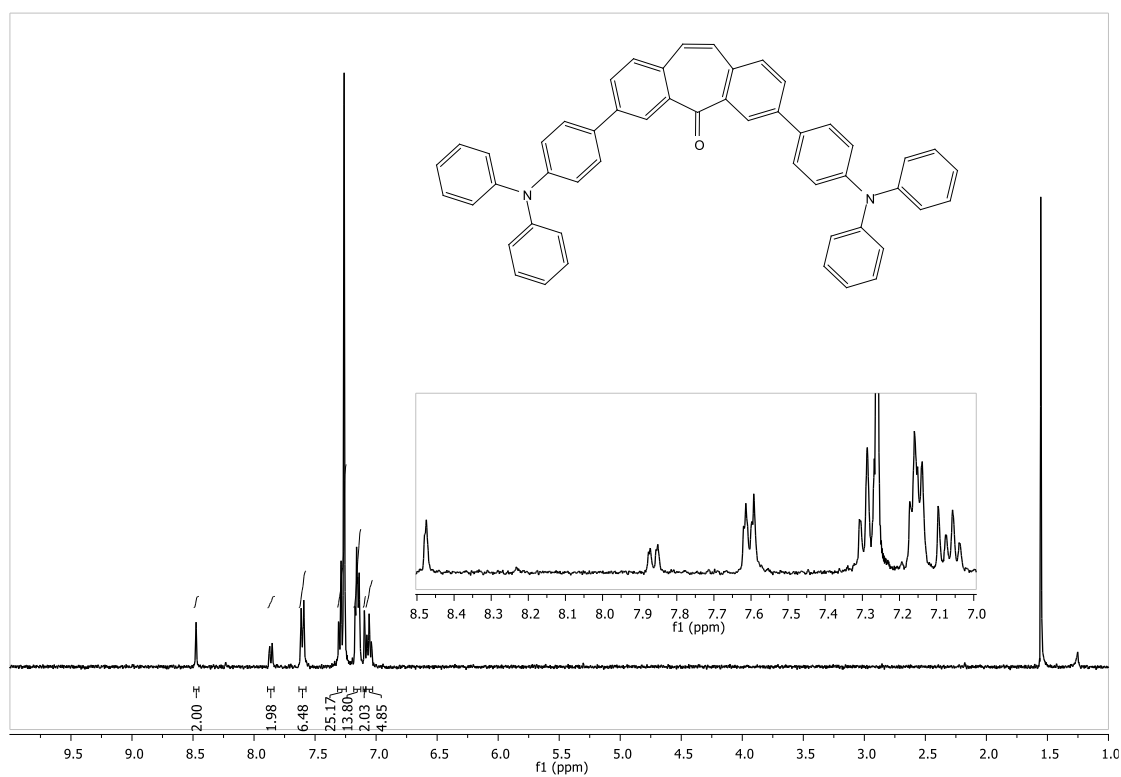

**Figure 2.** <sup>13</sup>C-NMR (100 MHz, CDCl<sub>3</sub>) spectrum of the compound **3**.

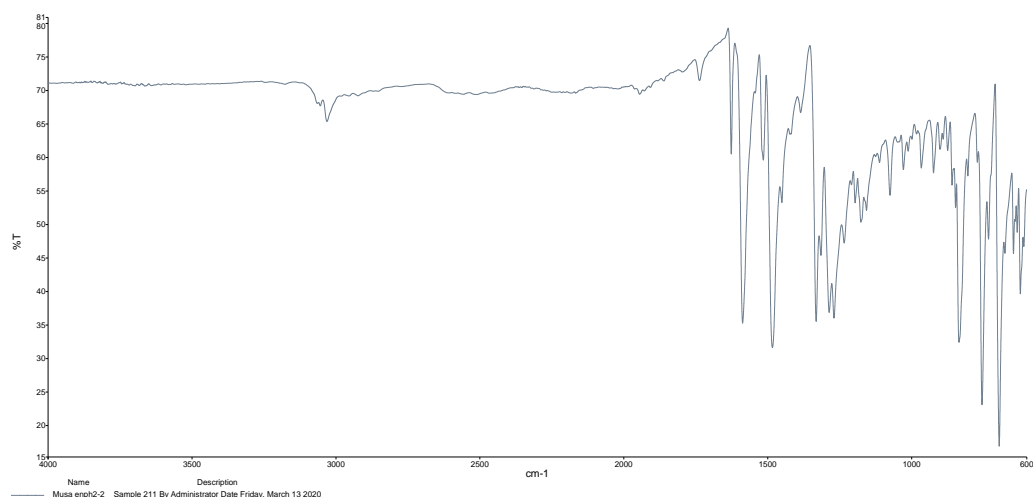

**Figure 3.** FT-IR spectrum of the compound **3**.

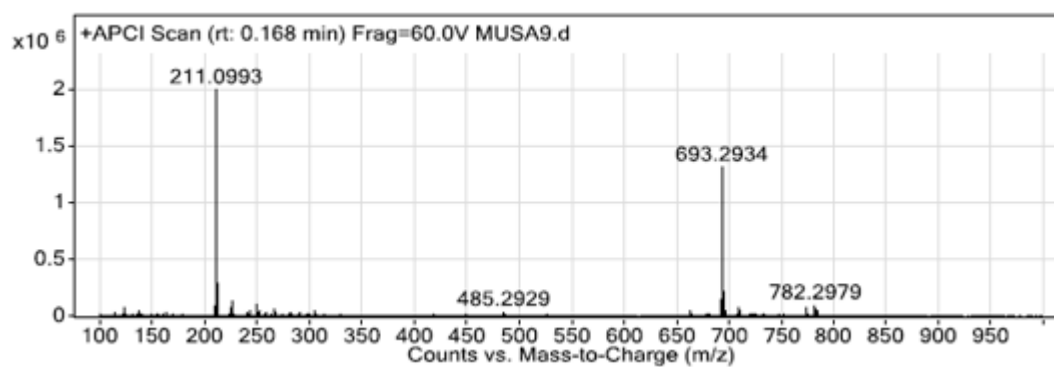

**Figure 4.** HRMS spectrum of the compound **3**.
